# Supplementary material for: Performance of the Trioplex real-time RT-PCR assay for detection of Zika, dengue, and chikungunya viruses
Source: PubMed Central journal article supplement (PMC5895813; doi:10.1038/s41467-018-03772-1), 2018-04-11
Supplement: 41467_2018_3772_MOESM1_ESM.pdf [file 41467_2018_3772_MOESM1_ESM.pdf]

## SUPPLEMENTARY INFORMATION

**Supplementary Table 1. ZIKV RNA stability in whole blood**

| Sample # | CT Values |              |              |                 | Average | Std. Dev. | Variance |
|----------|-----------|--------------|--------------|-----------------|---------|-----------|----------|
|          | Fresh     | 3 days (4°C) | 9 days (4°C) | 10 days (-20°C) |         |           |          |
| 1        | 30.05     | 29.60        | 28.58        | 29.68           | 29.48   | 0.63      | 0.30     |
| 2        | 34.92     | 32.66        | 32.02        | 32.19           | 32.95   | 1.34      | 1.35     |
| 3        | 26.31     | 25.24        | 25.59        | 27.13           | 26.07   | 0.84      | 0.53     |
| 4        | 25.50     | 25.17        | 25.15        | 26.78           | 25.65   | 0.77      | 0.44     |
| 5        | 36.22     | 33.61        | 34.08        | 32.96           | 34.22   | 1.41      | 1.49     |
| 6        | 28.33     | 23.88        | 24.08        | 24.36           | 25.16   | 2.12      | 3.37     |
| 7        | 29.20     | 30.79        | 29.05        | 28.66           | 29.43   | 0.94      | 0.66     |
| 8        | 32.15     | 32.11        | 30.92        | 31.11           | 31.57   | 0.65      | 0.32     |
| 9        | 26.33     | 27.18        | 27.78        | 27.35           | 27.16   | 0.61      | 0.28     |
| 10       | 34.96     | 35.49        | 34.25        | 33.91           | 34.65   | 0.71      | 0.38     |
| 11       | 33.61     | 33.00        | 28.23        | 31.93           | 31.69   | 2.41      | 4.36     |
| 12       | 26.85     | 26.98        | 32.50        | 26.30           | 28.16   | 2.91      | 6.35     |
| 13       | 32.79     | 32.68        | 33.36        | 35.61           | 33.61   | 1.37      | 1.40     |
| 14       | 34.31     | 34.98        | 33.22        | 34.65           | 34.29   | 0.76      | 0.44     |
| 15       | 32.82     | 35.29        | 25.18        | 32.60           | 31.47   | 4.37      | 14.31    |
| 16       | 24.33     | 24.32        | 33.35        | 25.42           | 26.86   | 4.36      | 14.26    |
| 17       | 28.76     | 28.62        | 30.42        | 33.36           | 30.29   | 2.20      | 3.64     |
| 18       | 31.34     | 30.97        | 33.06        | 32.67           | 32.01   | 1.01      | 0.77     |
| 19       | 34.07     | 33.51        | 33.61        | 35.89           | 34.27   | 1.11      | 0.92     |
| 20       | 35.41     | 36.33        | 30.69        | 35.82           | 34.56   | 2.61      | 5.10     |
| 21       | 27.88     | 28.25        | 30.22        | 26.84           | 28.30   | 1.41      | 1.50     |
| 22       | 30.75     | 31.87        | 34.36        | 31.26           | 32.06   | 1.60      | 1.92     |
| 23       | 35.53     | 35.93        | 31.94        | 33.60           | 34.25   | 1.85      | 2.55     |
| 24       | 32.80     | 33.75        | 30.68        | 31.86           | 32.27   | 1.31      | 1.29     |
| 25       | 31.12     | 31.65        | 29.09        | 30.30           | 30.54   | 1.11      | 0.93     |
| 26       | 30.06     | 31.81        | 29.13        | 28.61           | 29.90   | 1.41      | 1.48     |
| 27       | 28.30     | 27.33        | 33.44        | 27.24           | 29.08   | 2.95      | 6.52     |
| 28       | 34.11     | 31.42        | 33.00        | 33.91           | 33.11   | 1.23      | 1.13     |
| 29       | 33.14     | 34.25        | 33.40        | 34.74           | 33.88   | 0.74      | 0.41     |
| 30       | 35.35     | 35.26        | 31.09        | 33.33           | 33.76   | 2.01      | 3.02     |
| 31       | 30.74     | 35.22        | 33.50        | 30.01           | 32.37   | 2.42      | 4.41     |
| 32       | 32.02     | 35.81        | 32.87        | 31.29           | 33.00   | 1.98      | 2.95     |
| 33       | 32.91     | 35.43        | 31.77        | 31.78           | 32.97   | 1.72      | 2.23     |
| 34       | 34.05     | 33.68        | negative     | 32.41           | 33.38   | 0.86      | 0.49     |

**Supplementary Table 2. Triplex Assay cross-reactivity with non-target arboviruses**

| <b>Virus</b>                 | <b>Strain</b>                        | <b>ZIKV result</b>  | <b>DENV result</b>  | <b>CHIKV result</b> |
|------------------------------|--------------------------------------|---------------------|---------------------|---------------------|
| West Nile virus              | NY99                                 | No cross-reactivity | No cross-reactivity | No cross-reactivity |
| yellow fever virus           | 17D                                  | No cross-reactivity | No cross-reactivity | No cross-reactivity |
| St. Louis encephalitis virus | MSI-7                                | No cross-reactivity | No cross-reactivity | No cross-reactivity |
| Zika virus*                  | French Polynesia 2013                | n/a                 | No cross-reactivity | No cross-reactivity |
| dengue virus*                | Representatives from all 4 serotypes | No cross-reactivity | n/a                 | No cross-reactivity |
| chikungunya virus*           | Puerto Rico                          | No cross-reactivity | No cross-reactivity | n/a                 |

\* Cross-reactivity findings for these three viruses were extrapolated from data presented in limit of detection, contrived specimen and archived clinical specimen evaluations. N/A not applicable.

**Supplementary Table 3. Zika virus detection in clinical specimens**

|               | <b>Serum</b>                                                         | <b>Urine</b>                                                         | <b>Whole blood-EDTA</b>                                              |
|---------------|----------------------------------------------------------------------|----------------------------------------------------------------------|----------------------------------------------------------------------|
| <b>CT</b>     | 31.96 median<br>3.22 std. dev.<br>(31.10, 31.82) 95% CI              | 32.58 median<br>3.98 std. dev.<br>(31.87, 32.76) 95% CI              | 31.41 median<br>3.82 std. dev.<br>(30.59, 31.47) 95% CI              |
| <b>GCE/mL</b> | 4.72E+04 median<br>1.03E+01 std. dev.<br>(5.22E+04, 8.79E+04) 95% CI | 2.94E+04 median<br>1.31E+01 std. dev.<br>(2.54E+04, 4.50E+04) 95% CI | 7.08E+04 median<br>1.52E+01 std. dev.<br>(6.98E+04, 1.31E+05) 95% CI |
|               | <b>Serum RP</b>                                                      | <b>Urine RP</b>                                                      | <b>Whole blood-EDTA RP</b>                                           |
| <b>CT</b>     | 25.50 median<br>23.35-37.26 range<br>(28.11, 28.69) 95% CI           | 35.54 median<br>21.85-37.59 range<br>(31.90, 32.71) 95% CI           | 24.27 median<br>20.36-30.98 range<br>(24.16, 24.60) 95% CI           |
